# Supplementary material for: Temperature-induced changes in egg white antimicrobial concentrations during pre-incubation do not influence bacterial trans-shell penetration but do affect hatchling phenotype in Mallards
Source: PeerJ journal article supplement (doi:10.7717/peerj.12401), 2021-11-11

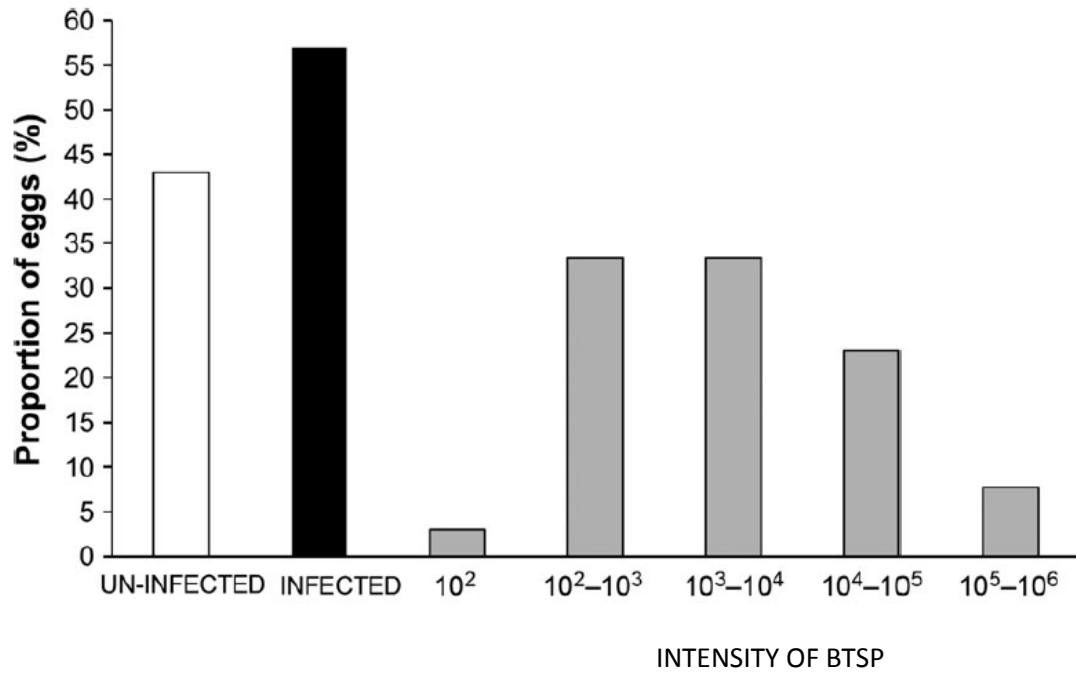

Supplement: Supplementary_Figure_S2.pdf [file Supplementary_Figure_S2.pdf]
